# Supplementary material
Source: PubMed Central journal article supplement (PMC2844774)
Supplement: NIHMS185873-supplement-tables.pdf [file NIHMS185873-supplement-tables.pdf]

|             |                          | BT474 | MDA-MB-468 |
|-------------|--------------------------|-------|------------|
| <b>0hr</b>  | <b>sub-G<sub>1</sub></b> | 3.8   | 7.6        |
|             | <b>G<sub>1</sub></b>     | 65.3  | 35         |
|             | <b>S</b>                 | 9.8   | 12.3       |
|             | <b>G<sub>2</sub>/M</b>   | 21.1  | 45.1       |
| <b>6hr</b>  | <b>sub-G<sub>1</sub></b> | 4.9   | 5.5        |
|             | <b>G<sub>1</sub></b>     | 43.3  | 27.4       |
|             | <b>S</b>                 | 6.8   | 11.4       |
|             | <b>G<sub>2</sub>/M</b>   | 45    | 55.7       |
| <b>16hr</b> | <b>sub-G<sub>1</sub></b> | 5.2   | 10.2       |
|             | <b>G<sub>1</sub></b>     | 45.8  | 15.2       |
|             | <b>S</b>                 | 9.6   | 11.2       |
|             | <b>G<sub>2</sub>/M</b>   | 39.4  | 63.4       |
| <b>48hr</b> | <b>sub-G<sub>1</sub></b> | 13.6  | 35.9       |
|             | <b>G<sub>1</sub></b>     | 14.5  | 7.68       |
|             | <b>S</b>                 | 8.2   | 17.7       |
|             | <b>G<sub>2</sub>/M</b>   | 63.7  | 38.7       |

|                    | <b>N</b> | <b>PR<br/>d60</b> | <b>CR<br/>d60</b> | <b>TGI<br/>d60<br/>%</b> | <b>Weight<br/>Loss<br/>%</b> | <b>Tumor<br/>Volume<br/>Day 60</b> | <b>p-value<br/>(relative to<br/>control)</b> |
|--------------------|----------|-------------------|-------------------|--------------------------|------------------------------|------------------------------------|----------------------------------------------|
| Ispinesib 7.5mg/kg | 8        | 3                 | 5                 | 98                       | 11                           | 17                                 | <0.001                                       |
| Ispinesib 5mg/kg   | 8        | 5                 | 3                 | 97                       | 5                            | 47                                 | <0.001                                       |
| Ixabepilone 5mg/kg | 8        | 6                 | 2                 | 97                       | 8                            | 59                                 | 0.005                                        |
| Ixabepilone 3mg/kg | 9        | 6                 | 2                 | 78                       | 7                            | 232                                | <0.001                                       |
| Paclitaxel 30mg/kg | 7        | 5                 | 2                 | 99                       | 6                            | 13                                 | <0.001                                       |
| Paclitaxel 15mg/kg | 8        | 2                 | 6                 | 99                       | 4                            | 19                                 | 0.001                                        |

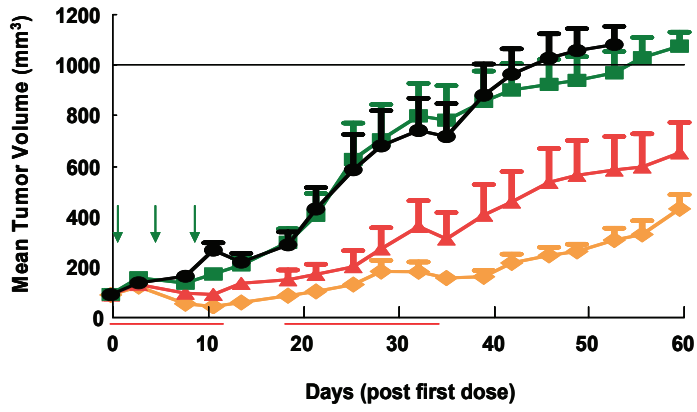

- Vehicle
- Ispinesib 3mg/kg
- ▲ Lapatinib 40mg/kg
- ◆ Ispinesib 3mg/kg + Lapatinib 40mg/kg
